# Supplementary material for: Assessment of l-Asparaginase Pharmacodynamics in Mouse Models of Cancer
Source: PubMed Central journal article supplement (PMC6359345; doi:10.3390/metabo9010010), 2019-01-09
Supplement: metabolites-09-00010-s001.pdf [file metabolites-09-00010-s001.pdf]

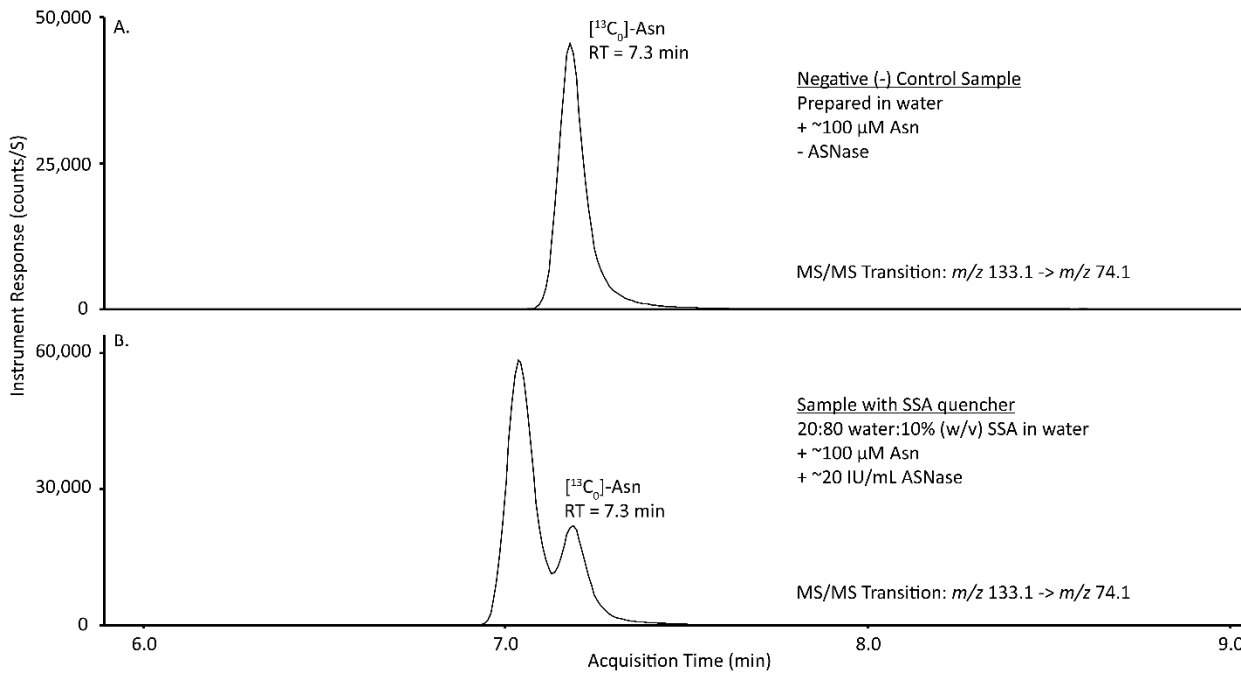

**Figure S1. Sulfosalicylic Acid Exhibits an Effect on Asn Chromatography.** Sulfosalicylic acid (SSA) has been previously reported as an effective quencher of ASNase activity in human clinical whole blood samples. We tested the quenching efficacy of a 8% (w/v) SSA solution on ASNase activity in a neat solution (20:80 water:10% (w/v) sulfosalicylic acid (SSA) in water) that contained an Asn concentration and ASNase activity of approximately 100 μM and 20 IU/mL, respectively, following the method described in Experimental Methods section. The presence of the SSA quencher in the neat sample did halt the ASNase-mediated conversion of Asn to Asp in the sample but proved to have deleterious effects on Asn chromatography (Figure S-2), so SSA was not chosen for use in the final method. Extracted-ion chromatograms (XICs) for the transitions monitored are shown for Asn for the following samples: A: a negative control sample prepared in water that contained approximately 100 μM of Asn and without ASNase; B: an SSA quenched sample that contained an Asn concentration and ASNase activity of approximately 100 μM and 20 IU/mL, respectively, in 20:80 water:10% (w/v) SSA in water. Although SSA was effective in quenching ASNase (no Asp formation was detected), the presence of the SSA quencher in the sample had an effect on the chromatographic retention of Asn for the HILIC-based chromatographic system described herein.

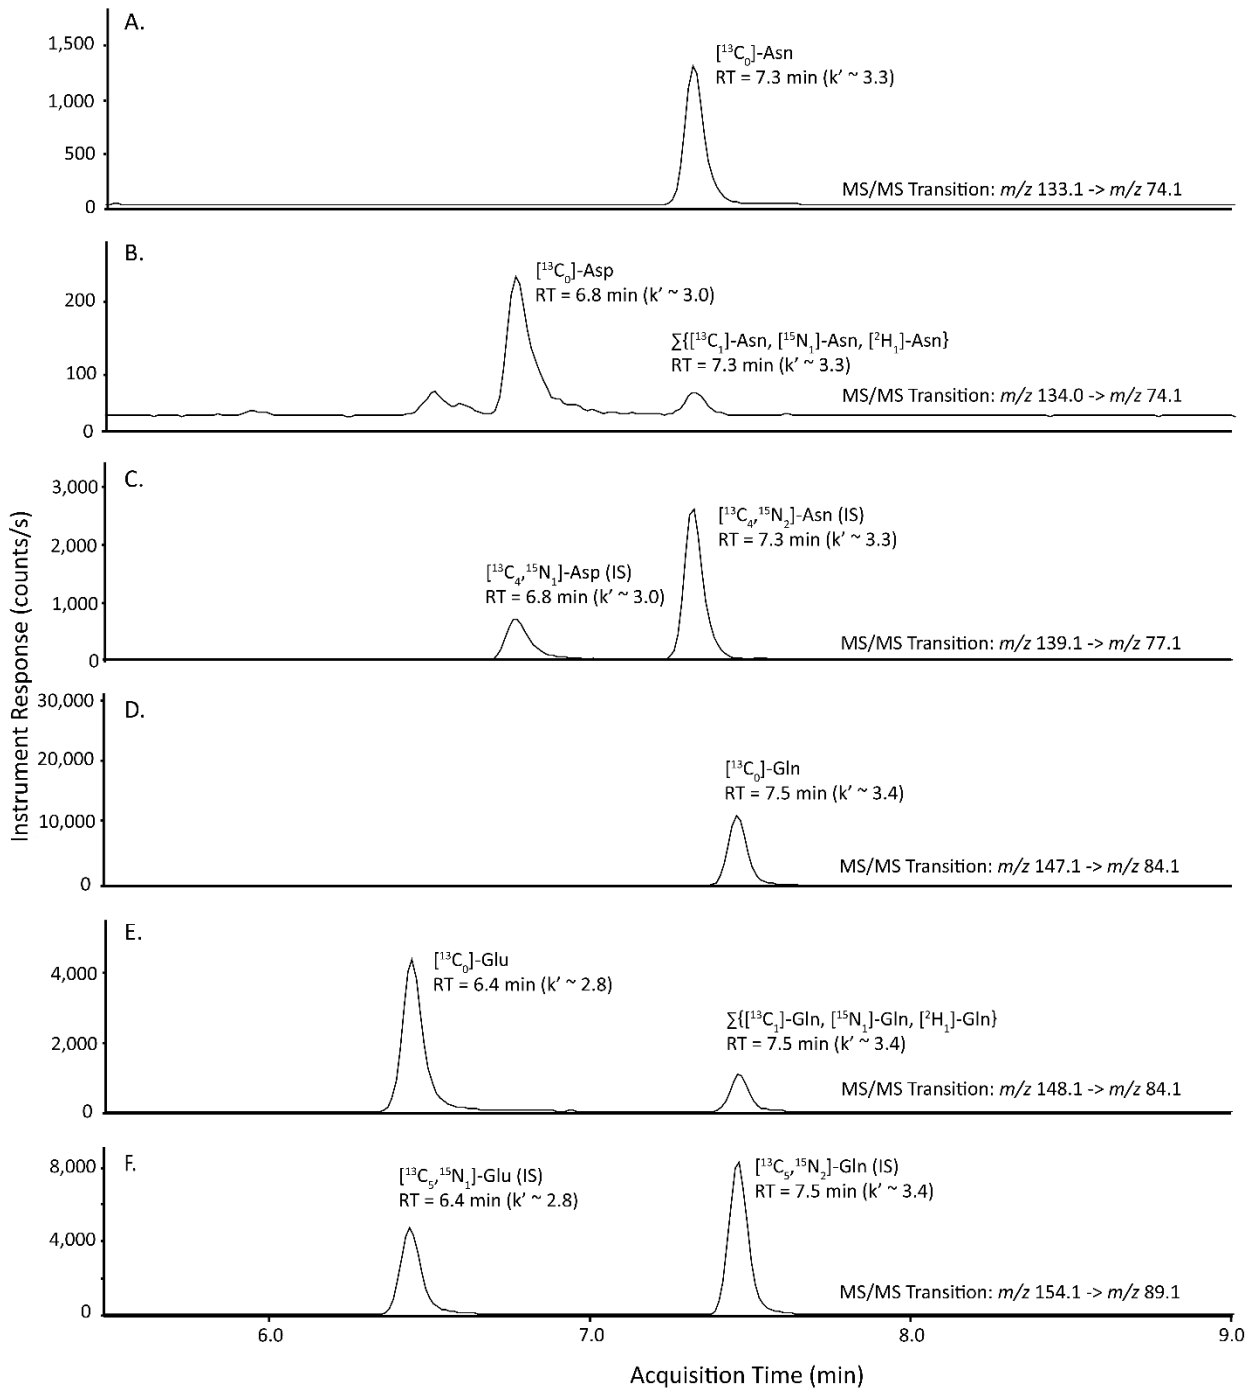

**Figure S2. Extracted-ion chromatograms (XIC) for the transitions monitored.** A: Asn; B: Asp (RT=6.8 min); C:  $[^{13}\text{C}_4, ^{15}\text{N}_2]\text{-Asn}$  and  $[^{13}\text{C}_4, ^{15}\text{N}_2]\text{-Asp}$  IS compounds; D: Gln; E: Glu (RT=6.4 min); F:  $[^{13}\text{C}_5, ^{15}\text{N}_2]\text{-Gln}$  and  $[^{13}\text{C}_5, ^{15}\text{N}_2]\text{-Glu}$  IS compounds. The chromatograms depicted here were acquired from a representative pre-treatment whole blood mouse study sample.

**Table S1: Compiled Biological Reactions Involving Asparagine, Aspartic Acid, Glutamine, and Glutamic Acid**

**ASN**

| direction | substrate_or_product                                     | gene          |
|-----------|----------------------------------------------------------|---------------|
| -->       | AMP + an L-asparaginy-[tRNAAsn] + diphosphate            | NARS,NARS2    |
| -->       | L-aspartate + ammonium                                   | ASRGL1,ASPG   |
| <--       | ATP + H2O + L-aspartate + L-glutamine                    | ASNS          |
| <--       | ATP + L-aspartate + ammonium                             | ASNS          |
| <--       | H2O + an L-asparaginy-[tRNAAsn]                          | PTRH1,PTRH2   |
| <--       | N4-( $\beta$ -N-acetyl-D-glucosaminy)-L-asparagine + H2O | non-enzymatic |

**ASP**

| direction | substrate_or_product                                        | gene          |
|-----------|-------------------------------------------------------------|---------------|
| -->       | 5'-phosphoribosyl-4-(N-succinocarboxamide)-5-aminoimidazole | PAICS         |
| -->       | AMP + H+ + L-arginino-succinate + diphosphate               | ASS1          |
| -->       | AMP + H+ + L-asparagine + L-glutamate + diphosphate         | ASNS          |
| -->       | AMP + H+ + L-asparagine + diphosphate                       | ASNS          |
| -->       | AMP + an L-aspartyl-[tRNAasp] + diphosphate                 | DARS,DARS2    |
| -->       | GDP + H+ + adenylo-succinate + phosphate                    | ADSS,ADSSL1   |
| -->       | N-carbamoyl-L-aspartate + H+ + phosphate                    | CAD           |
| --        | H+ + NAD(P)H + ammonium + oxaloacetate                      | ASPDH         |
| --        | L-glutamate + oxaloacetate                                  | GOT2          |
| <-->      | L-glutamate + oxaloacetate                                  | GOT1,GOT1L1   |
| <--       | H2O + L-alanyl-L-aspartate                                  | non-enzymatic |
| <--       | H2O + L-asparagine                                          | ASRGL1,ASPG   |
| <--       | H2O + a dipetide with an N-terminal L-aspartate             | DPEP3         |
| <--       | H2O + a peptide with an N-terminal L-aspartate              | DNPEP         |
| <--       | H2O + a protein                                             | ASRGL1        |
| <--       | H2O + an N-acyl-L-aspartate                                 | ASPA,ACY3     |
| <--       | N-acetyl-L-aspartate + H2O                                  | non-enzymatic |
| <--       | N4-( $\beta$ -N-acetyl-D-glucosaminy)-L-asparagine + H2O    | AGA           |

**GLN**

| direction | substrate_or_product                                           | gene           |
|-----------|----------------------------------------------------------------|----------------|
| -->       | 2-(formamido)-N1-(5-phospho- $\beta$ -D-ribosyl)acetamidine +  | PFAS           |
| -->       | 5-phospho- $\beta$ -D-ribosylamine + L-glutamate + diphosphate | PPAT           |
| -->       | ADP + CTP + H+ + L-glutamate + phosphate                       | CTPS1,CTPS2    |
| -->       | ADP + H+ + L-glutamate + an L-asparaginy-[tRNAAsn] + phosph    | QRSL1,PET112L  |
| -->       | ADP + H+ + L-glutamate + an L-glutaminy-[tRNAGln] + phosph     | PET112L,QRSL1  |
| -->       | ADP + H+ + L-glutamate + carbamoyl phosphate + phosphate       | CAD            |
| -->       | AMP + GMP + H+ + L-glutamate + diphosphate                     | GMPS           |
| -->       | AMP + H+ + L-asparagine + L-glutamate + diphosphate            | ASNS           |
| -->       | AMP + H+ + L-glutamate + NAD+ + diphosphate                    | NADSYN1        |
| -->       | AMP + an L-glutaminy-[tRNAGln] + diphosphate                   | QARS           |
| -->       | L-glutamate + ammonium                                         | GLS2,ASNS,GLS1 |

|      |                                         |             |
|------|-----------------------------------------|-------------|
| <--> | 2-oxoglutaramate + L-methionine         | CCBL1       |
| <--> | 2-oxoglutaramate + L-phenylalanine      | CCBL1       |
| <--> | D-glucosamine 6-phosphate + L-glutamate | GFPT1,GFPT2 |
| <--  | ATP + L-glutamate + ammonium            | GLUL        |

## GLU

| direction | substrate_or_product                                           | gene                   |
|-----------|----------------------------------------------------------------|------------------------|
| -->       | &gamma-L-glutamyl 5-phosphate + ADP                            | ALDH18A1               |
| -->       | &gamma-L-glutamyl-L-cysteine + ADP + H+ + phosphate            | GCLM,GCLC              |
| -->       | (S)-1-pyrroline-5-carboxylate + H2O + NAD+                     | ALDH4A1                |
| -->       | 2-oxoglutarate + 3-phospho-L-serine                            | PSAT1                  |
| -->       | 2-oxoglutarate + L-ornithine                                   | non-enzymatic          |
| -->       | 4-aminobutanoate + CO2                                         | GAD1,GAD2,GLUL         |
| -->       | ADP + H+ + L-glutamine + phosphate                             | GLUL                   |
| -->       | ADP + a 10-formyltetrahydrofolate + phosphate                  | FPGS                   |
| -->       | ADP + a 5,10-methylenetetrahydrofolate + phosphate             | non-enzymatic          |
| -->       | ADP + a tetrahydrofolate + phosphate                           | FPGS                   |
| -->       | AMP + an L-glutamyl-[tRNAGln] + diphosphate                    | non-enzymatic          |
| -->       | AMP + an L-glutamyl-[tRNAGlu] + diphosphate                    | EPRS,EARS2             |
| -->       | H2O + L-glutamate-5-semialdehyde + NAD+                        | ALDH4A1                |
| -->       | N-acetyl-&alpha;-L-aspartyl-L-glutamate + ADP + H+ + phosphate | RIMKLA                 |
| --        | 2-oxoglutarate + 4-phosphooxy-L-threonine                      | PSAT1                  |
| --        | 2-oxoglutarate + H+ + NADH + ammonium                          | non-enzymatic          |
| --        | 2-oxoglutarate + L-aspartate                                   | GOT2                   |
| --        | N-acetyl-L-glutamate + H+ + coenzyme A                         | NAGS                   |
| <-->      | &beta;-D-fructofuranose 6-phosphate + L-glutamine              | GFPT1,GFPT2            |
| <-->      | &beta;-alanine + 2-oxoglutarate                                | ABAT                   |
| <-->      | (S)-3-amino-2-methylpropanoate + 2-oxoglutarate                | ABAT                   |
| <-->      | 2-oxoglutarate + 3-O-methyldopa                                | non-enzymatic          |
| <-->      | 2-oxoglutarate + 3-hydroxy-L-kynurenine                        | CCBL2,AADAT            |
| <-->      | 2-oxoglutarate + 3-sulfinioalanine                             | GOT1                   |
| <-->      | 2-oxoglutarate + L-alanine                                     | GPT,GPT2               |
| <-->      | 2-oxoglutarate + L-aspartate                                   | GOT1,GOT1L1            |
| <-->      | 2-oxoglutarate + L-cysteine                                    | GOT1                   |
| <-->      | 2-oxoglutarate + L-dopa                                        | non-enzymatic          |
| <-->      | 2-oxoglutarate + L-kynurenine                                  | CCBL2,CCBL1,GOT2,AADAT |
| <-->      | 2-oxoglutarate + L-lysine                                      | non-enzymatic          |
| <-->      | 2-oxoglutarate + L-tyrosine                                    | TAT                    |
| <-->      | 2-oxoglutarate + erythro-4-hydroxy-L-glutamate                 | GOT2                   |
| <--       | (glutathion-S-yl)-4-hydroxy-2-nonenal + H2O                    | non-enzymatic          |
| <--       | 2-oxoglutarate + 4-aminobutanoate                              | ABAT                   |
| <--       | 2-oxoglutarate + L-2-aminoadipate                              | AADAT                  |
| <--       | 2-oxoglutarate + L-isoleucine                                  | BCAT1,BCAT2            |
| <--       | 2-oxoglutarate + L-leucine                                     | BCAT1,BCAT2            |
| <--       | 2-oxoglutarate + L-valine                                      | BCAT1,BCAT2            |
| <--       | 5-oxo-L-proline + ATP + H2O                                    | OPLAH                  |

|     |                                                             |                               |
|-----|-------------------------------------------------------------|-------------------------------|
| <-- | 5-phospho-&alpha-D-ribose 1-diphosphate + H2O + L-glutamin  | PPAT                          |
| <-- | ATP + H2O + L-aspartate + L-glutamine                       | ASNS                          |
| <-- | ATP + H2O + L-glutamine + UTP                               | CTPS1,CTPS2                   |
| <-- | ATP + H2O + L-glutamine + XMP                               | GMPS                          |
| <-- | ATP + H2O + L-glutamine + an L-aspartyl-[tRNAAsn]           | QRSL1,PET112L                 |
| <-- | ATP + H2O + L-glutamine + an L-glutamyl-[tRNAGln]           | PET112L,QRSL1                 |
| <-- | ATP + H2O + L-glutamine + hydrogencarbonate                 | CAD                           |
| <-- | ATP + H2O + L-glutamine + nicotinate adenine dinucleotide   | NADSYN1                       |
| <-- | H2O + L-glutamine                                           | GLS2,ASNS,GLS1                |
| <-- | H2O + L-saccharopine + NAD+                                 | AASS                          |
| <-- | H2O + a glutathione-S-conjugate                             | GGT5,GGT1                     |
| <-- | H2O + a peptide                                             | FOLH1,NAALADL1,NAALAD2,FOLH1B |
| <-- | H2O + a tetrahydrofolate                                    | non-enzymatic                 |
| <-- | H2O + an N-terminal L-glutamyl-[protein]                    | ENPEP                         |
| <-- | H2O + glutathione                                           | GGT1,GGT2,GGT5                |
| <-- | H2O + leukotriene-C4                                        | GGT5,GGT1                     |
| <-- | N-formimino-L-glutamate + a tetrahydrofolate                | FTCD                          |
| <-- | N2-formyl-N1-(5-phospho-&beta-D-ribosyl)glycinamide + ATP + | PFAS                          |
